1 **Gene silencing in *Cryptosporidium*: A rapid approach to identify novel targets for**  
2 **drug development.**

3

4 Castellanos-Gonzalez A\*<sup>1</sup>, Martinez-Traverso G<sup>1</sup>, Fishbeck K, Nava S<sup>1</sup>, White AC Jr<sup>1</sup>. Infectious  
5 Disease Division, Department of Internal Medicine, University of Texas Medical Branch,  
6 Galveston Tx<sup>1</sup>

7

8

9

10

11

12

13

14

15

16 **\*Address correspondence to:**

17 Alejandro Castellanos-Gonzalez  
18 Infectious Disease Division  
19 Department of Internal Medicine  
20 University of Texas Medical Branch  
21 301 University Boulevard, Route 0435  
22 Galveston, TX 77555-0435  
23 Email [alcastel@utmb.edu](mailto:alcastel@utmb.edu)

24

25

26 **Key words:** *Cryptosporidium*, Cryptosporidiosis, Gene silencing, Ellagic Acid

27

28 **Abstract:**

29 **Background:** Cryptosporidiosis is a major cause of diarrheal disease. However, the only drug  
30 approved for cryptosporidiosis does not work well in high risk populations. Therefore, novel  
31 drugs are urgently needed. Then, the identification of novel is necessary to develop new  
32 therapies against this parasite. Recently, we have developed a rapid method to block gene  
33 expression in *Cryptosporidium* by using pre-assembled complexes of *Cryptosporidium*  
34 antisense RNA and human protein with slicer activity (Argonaute 2). We hypothesized that  
35 structural proteins, proteases, enzymes nucleotide synthesis and transcription factors are  
36 essential for parasite development, thus in this work we knock down expression of 4 selected  
37 genes: Actin, Apicomplexan DNA-binding protein (AP2), Rhomboid protein 1 (Rom 1) and  
38 nucleoside diphosphate kinase (NDK) and elucidated its role during invasion, proliferation and  
39 egress of *Cryptosporidium*.

40  
41 **Methods:** We used protein transfection reagents (PTR) to introduce pre-assembled complexes  
42 of antisense RNA and human Argonaute 2 into *Cryptosporidium parvum* oocysts, the complexes  
43 blocked expression of Actin (Act), Transcription factor AP2 (AP2), nucleoside diphosphate  
44 kinase (DKN), and rhomboid protein 1 (Rom1). After gene silencing, we evaluated parasite  
45 reduction using *In vitro* models of excystation, invasion, proliferation and egress. We evaluated  
46 the potency of ellagic acid, a nucleoside diphosphate kinase inhibitor for anti-cryptosporidial  
47 activity using a model of *in vitro* infection with human HCT-8 cells.

48  
49 **Results:** Silencing of Act, AP2, NDK and Rom1 reduce significantly invasion, proliferation and  
50 egress of *Cryptosporidium*. We showed that silencing of NDK markedly inhibited  
51 *Cryptosporidium* proliferation. This was confirmed by demonstration that ellagic acid reduced  
52 the number of parasites at micro molar concentrations (EC 50 =15-30  $\mu$ M) without showing any  
53 toxic effect on human cells.

54  
55 **Conclusions:** Overall the results confirmed the usefulness RNA silencing can be used to  
56 identify novel targets for drug development against *Cryptosporidium*. We identified ellagic acid  
57 (EA), a nucleoside diphosphate kinase inhibitor also blocks *Cryptosporidium* proliferation. Since  
58 EA is a dietary supplement approved for human use, then this compound should be studied as  
59 a potential treatment for cryptosporidiosis.

## 60 **Author summary**

61 The World Health Organization reports diarrhea kills around 760,000 children under five every  
62 year. *Cryptosporidium* infection is a leading cause of diarrhea morbidity and mortality. Current  
63 therapies to treat this infection are suboptimal, therefore novel treatments are urgently needed.  
64 We used genetic tools to identify novel targets for drug development, thus in this work we  
65 evaluated the role of 4 genes during *Cryptosporidium* infection. We demonstrated that silencing  
66 of nucleoside-diphosphate kinase (NDK) drastically reduced invasion, proliferation and egress  
67 of this parasite. To validate these finding we used the Ellagic acid (EA) an inhibitor of NDK to  
68 treat infected intestinal cells. Our results confirmed that the EA blocks parasite proliferation on  
69 infected cells. Interestingly we observed that the ellagic acid also has anti cryptosporidial activity  
70 by inducing apoptosis. Since EA is a dietary supplement already approved for human use, then  
71 this compound has potential to be used as a rapid alternative to treat Cryptosporidiosis.

72

## 73 **Introduction**

74 *Cryptosporidium* is a leading cause of moderate-to-severe diarrhea in children under two years  
75 old and the leading pathogen associated with death in toddlers (ages 12 to 23 months<sup>1</sup>).  
76 Nitazoxanide is only one FDA approved medicine available for cryptosporidiosis, but it has  
77 limited efficacy in the population at the highest risk for poor outcomes. There is a strong  
78 consensus that better treatment options are urgently needed<sup>2-4</sup>. The limitation of tools to  
79 genetically manipulate gene expression in this parasite has been identified as a major hurdle for  
80 drug and vaccine development<sup>2,4</sup>. We developed a method to silence genes in this parasite by  
81 using preassembled complexes of *Cryptosporidium* single strand RNA and the human enzyme  
82 Argonaute 2 (hAgo2)<sup>5</sup>. We hypothesized that this method could be used to study key steps of  
83 infection and identify novel targets for drug and vaccine development. In the present work we

84 used gene silencing to evaluate the role of Actin (Act), Rhomboid protein 1 (Rom1), transcription  
85 factor AP2 (AP2) and Nucleoside diphosphate kinase (NDK) 1 during *Cryptosporidium* infection.

86

## 87 **Methods.**

### 88 **Target selection for silencing experiments.**

89 Initially, we selected 100 genes for silencing experiments (Table S1), for these experiments  
90 mRNA sequences were obtained from CryptoDB (<https://cryptodb.org/>) and Gene Bank data  
91 bases (<https://www.ncbi.nlm.nih.gov/nucleotide/>). Selected genes codes for: structural proteins,  
92 transcription factors, kinases and proteases (Table S1). In these experiments we observed  
93 silencing ranging from 30-94%, however in this study we only analyzed genes that were  
94 silenced >75% (Table 1, figure 1).

95

### 96 **Antisense ssRNA design.**

97 Antisense single stranded RNA (ssRNA) used in silencing experiments was designed by using  
98 the computational software sFold 2.2 (<http://sfold.wadsworth.org>). We used as template the full  
99 sequences of mRNA targets (accession numbers in table S1), initially we generated all possible  
100 ssRNA antisense sequences of 21 nucleotides for each target, however we only selected  
101 optimal ssRNAs based in sFold ranking, these scores reflects parameters such as, local free  
102 energy and binding probability (C-G>40%). We synthesized selected ssRNAs from a commercial  
103 vendor (Integrated DNA Technologies, Coralville, IA), for silencing experiments the ssRNA was  
104 modified as follow: 21 nt ssRNA was capped with a phosphorylation at 5' end and was modified  
105 with a deoxynucleotide (dTdT) tail at 3' end (Table S2). Scrambled control ssRNA (Table S2)  
106 was designed using siRNA wizard software (Invivogen, San Diego CA).

107

### 108 **Gene silencing in *C. parvum* oocysts.**

109 For transfection experiments, we used oocysts (Iowa isolate) purchased from University of  
110 Arizona (Sterling Laboratories, Tucson, AZ). First the oocysts were prepared for transfection: the  
111 oocysts ( $1 \times 10^6$  for each target) were transferred to 1.5 ml tubes, the samples were diluted with  
112 nuclease free water (Fisher Scientific, Hampton, NH) and then centrifuged for 10 minutes at a  
113 speed of 8,000 rpm (using microcentrifuge Eppendorf 5424). The supernatant was discarded  
114 and then the pellet was resuspended with 20  $\mu$ l of nuclease-free water and then the tubes with  
115 the sample were placed at RT before adding transfection reagents. To assemble silencer  
116 complexes, first the ssRNAs were diluted with water at 100 nM, then samples were heated for 1  
117 minute at 95°C and placed on ice. Complexes of ssRNA-hAgo2 were assembled in 1.5 ml  
118 microcentrifuge tubes, each tube contained 2.5  $\mu$ l of diluted ssRNA 100 nM, 2.5  $\mu$ l [62.5 ng/ $\mu$ l]  
119 of human Argonaute 2 (hAgo2) protein (Sino Biologicals, North Wales, PA) and 15  $\mu$ l of  
120 Assembling Buffer [2 mM Mg(OAc)<sub>2</sub>, 150 mM KOHAc, 30 mM HEPES, 5 mM DTT, nuclease-  
121 free water]. The mixture was incubated for 1 hour at RT. After incubation, the complexes were  
122 encapsulated by adding 15  $\mu$ l of protein transfection reagent (PTR) Pro-Ject™ (Thermo  
123 Scientific, Rockford, IL). The sample was mixed by pipetting and then incubated for 30 min, at  
124 RT. For transfection experiments the encapsulated complexes were added to oocysts and  
125 incubated at room temperature for 2 hrs. The slicer activity of hAgo2 was activated by  
126 incubating at 37 °C for 2 hrs. The reaction was stopped by adding 350  $\mu$ l RLT lysis buffer  
127 (RNeasy kit, Qiagen, Hilden, Germany) and then samples were stored at -20°C for its posterior  
128 analysis by RT-PCR. For some experiments we used only PTR or PTR with unrelated ssRNAs,  
129 scrambled ssRNA (Table S2).

130

### 131 **RNA extraction and evaluation of silencing by RT-PCR**

132 Prior to RNA isolation, samples (previously stored at -20°C) were thawed at 95°C for 2 minutes.  
133 Then, the total RNA was extracted from samples with the Qiagen's RNeasy Plus Mini Kit

134 (Qiagen, Valencia CA) following the instructions of the vendor. The RNA was eluted from  
135 purification columns with 100  $\mu$ l of RNase-free water, then the concentration of eluted RNA was  
136 determined by spectrophotometry using a NanoDrop 100 Spectrophotometer (Thermo Fisher  
137 Scientific, Waltham MA). The silencing in transfected oocysts was analyzed by qRT-PCR using  
138 qScript™ One-Step SYBR® Green qRT-PCR Kit, Low ROX™ (Quanta BioSciences/VWR,  
139 Radnor, PA). For RT-PCR experiments, reactions were assembled as follow: 2  $\mu$ l of purified  
140 RNA template [20 ng/ $\mu$ l], 5  $\mu$ l of the One-Step SYBR Green Master Mix, 0.25  $\mu$ l of each primer  
141 at a 10  $\mu$ M concentration, 0.25  $\mu$ l of the qScript One-Step reverse transcriptase, and 4.25  $\mu$ l of  
142 nuclease-free water for a total of 10  $\mu$ l of mix per sample. The RT-PCR mixture (total volume 12  
143  $\mu$ l) was transferred to 96-well Reaction Plates (0.1 mL) (Applied Biosystems, Foster City, CA)  
144 and then RT-PCR amplification was conducted on a 7500 Fast Real-Time PCR System  
145 (Applied Biosystems, Foster City, CA) with the following cycling conditions: 50°C for 15 minutes,  
146 95°C for 5 minutes, then 50 cycles of 95°C for 15 seconds and 63°C for 1 minute, followed by a  
147 melting point analysis (95°C for 15 seconds, 60°C for 1 minute, 95°C for 15 seconds and 60°C  
148 for 15 seconds). Before fold change analysis all the target Ct values for each silenced target  
149 were normalized against the *Cryptosporidium* GAPDH. To calculate fold changes between  
150 control samples and silenced samples, we used the  $\Delta\Delta$ Ct method. Results are shown by the  
151 average for each target with the respective standard deviation. List of primers used for RT-PCR  
152 is indicated in table S3.

### 153 **Oocyst excystation assays.**

154 Excystation of transfected oocysts was induced with acidic water and taurocholic acid as  
155 described before. Briefly, *Cryptosporidium* oocysts were pelleted by centrifugation (500 g),  
156 supernatant was discarded and then parasites were resuspended in 25  $\mu$ l acidic water (pH 2.5),  
157 and incubated for 10 minutes on ice. Then, excystation media 250  $\mu$ l (RPMI-1640 media, 1X

158 antibiotic/antimycotic solution and 0.8% taurocholic acid sodium salt hydrate] was added. The  
159 sample was incubated for 1 hour at 37°C. After excystation we evaluate excystation rate, then  
160 the sporozoites were stained with the vital dye carboxyfluorescein succinimidyl ester (CFSE)  
161 (CellTrace™, Thermo Fischer Scientific, Waltham, MA) by adding 2 µM of CFSE and  
162 incubating in the dark at 37°C for 15. After staining, the sporozoites were separated from  
163 unhatched oocysts by filtration using 3.0 µm nitrocellulose membranes (Merck Millipore Ltd.,  
164 County Cork, Ireland). Fluorescence of filtered samples was evaluated, for these experiments  
165 200 µl of each filtered sample was transferred to a 96-well plates (Costar, Corning, NY) and  
166 then fluorescence was measured with a microplate reader, (FLUOstar Omega, Ortenberg,  
167 Germany).

168

#### 169 **HCT8 cell culture**

170 For infection experiments we used ileocecal cells (HCT-8 cells, ATCC, Manassas, VA). For  
171 these experiments cells were thawed at 37°C and then resuspended with 500µl of RPMI-1640  
172 media (Gibco/Thermo Fisher Scientific, Waltham, MA) supplemented with 10% fetal bovine  
173 serum (FBS) (Stemcell Technologies, Vancouver, Canada) and 1X antibiotic/antimycotic  
174 solution (Gibco/Thermo Fisher Scientific, Waltham, MA) and plated in a 24-well plate (Costar,  
175 Corning, NY). Cells were incubated at 37°C overnight.

176

#### 177 **In vitro Invasion assay.**

178 For invasion assay HCT8 cells were cultured as described. Before the infection, transfected  
179 parasites were stained and excysted as described. After filtering, approximately  $5 \times 10^5$   
180 (suspended in 250 µl) were added to HCT-8 cells for 1 hr at 37°C. To quantify sporozoites that  
181 did not invade cells, 250 µl of the supernatant was collected after incubation and fixed with 50 µl  
182 of 4.2%paraformaldehyde solution (Cytifix/Cytoperm, BD BioSciences, San Jose CA). To

183 quantify sporozoites adhered to the cells, the monolayers were trypsinized by adding 150  $\mu$ l of  
184 0.25% trypsin-EDTA (Gibco/Thermo Fisher Scientific, Waltham, MA), and incubating at 37°C for  
185 15 minutes. Then, the trypsin was inactivated by adding 500  $\mu$ l of RPMI media supplemented  
186 with 10% FBS. Samples were transferred to 1.5 ml tubes and then centrifuged 10 min at 500 g,  
187 supernatant was removed, and pellet was resuspended in 50  $\mu$ l of Cytofix solution. Fixed  
188 sample was resuspended in 200  $\mu$ l of 1X PBS (Fisher Scientific, Fair Lawn, NJ) and was filtered  
189 using a 5 ml Falcon polystyrene round-bottom tube with a cell-strainer cap with a 35  $\mu$ m nylon  
190 mesh (Corning Inc., Corning, NY). Filtered samples were analyzed by flow cytometry using a  
191 SE500 Flow Cytometer (Stratedigm, San Jose CA). To define sporozoites populations on  
192 infected cells, we analyzed filtered sporozoites stained with CFSE but without HCT-8 cells (Fig  
193 1A).

194

#### 195 **In vitro Proliferation assay.**

196 The vital dye, CFSE (Thermo Fisher Scientific, Waltham, MA) was used to track proliferation  
197 tracker of intracellular stages of *C. parvum*. CFSE is activated by viable cells. However, with  
198 each cycle of cell division, the fluorescent intensity decreases. Thus, proliferation was evaluated  
199 by measuring the reduction of fluorescence intensity by flow cytometry after 16 hours (Fig 3A  
200 and 3B). For these experiments the parasites were silenced (or not) and excysted as described  
201 before. After excystation, sporozoites were used to infect HCT-8 cells cultured as previously  
202 described. Basal infection was allowed for 2 hours at 37°C. The monolayer was then washed  
203 and media replaced with 250  $\mu$ l of fresh RPMI-1640 with 10% FBS and 1X antibiotic/antimycotic  
204 solution. Infected cells were incubated at 37°C for 16 hours (before parasite egress at 19-24  
205 hrs). After incubation, cells were harvested by trypsinization and then washed, fixed,  
206 resuspended in 1X PBS and analyzed by flow cytometry.

207



208 **Merozoite egress assay.**

209 We evaluated the effect of silencing using an egress model by measuring the number of  
210 merozoites in supernatants collected between 16-19 hrs post-infection. For these experiments  
211 we induced the silencing after infection of the HCT-8 cells. After sporozoite infection of HCT-8  
212 cells, media was removed and cells were transfected with ssRNA/hAgo2 complexes and  
213 incubated at 37°C for 16 or 19 hours. RPMI media was removed at 16 hours, replaced with 250  
214 µl of fresh RPMI media, and incubated for 3 hours more to complete the 19 hours incubation  
215 period. After incubations, the supernatant was collected, filtered and fixed as before. After the  
216 supernatant was removed, the remaining cell monolayer was trypsinized, washed, fixed and  
217 filtered. The supernatant and the cells monolayer were separately analyzed by flow cytometry.  
218

219 **Anticryptosporidial activity of ellagic acid on infected cells.**

220 To evaluate anticryptosporidial effect of ellagic acid HCT-8 cells were infected with CFSE-  
221 labeled sporozoites. After 1 hour of infection, media was replaced with 250 µl of serum-free  
222 RPMI media (free serum) containing varying concentrations of ellagic acid [0, 3, 30, 300 nM and  
223 3µM] and incubated the sample for 16 hrs. After the incubation, the monolayers in the plate  
224 were washed with PBS. The cells were trypsinized, fixed and analyzed by flow cytometry as  
225 described. For RT-PCR experiments, monolayers were washed with PBS. After removing the  
226 supernatant, 350 µl of RLT buffer was added and RNA extracted with RNAeasy kit  
227

228 **Results**

229 ***Silencing of Actin, Rom1, NDK, and TB2.*** Four (21nt) ssRNA antisense sequences each were  
230 synthesized complementary to mRNA of Actin, Rom1, DKN, and TB2 (Table S2). Complexes for  
231 all 4 targeted genes led to >75% decreased expression when compared to controls (unrelated

232 ssRNA, scramble ssRNA or untreated parasites, (Table 1). ssRNA-Ago did not affect the  
233 expression of non-targeted GAPDH mRNA, ribosomal r18s, or parasite viability (Fig. S2).

234

235 ***Silenced targets are not involved on excystation of *Cryptosporidium* parasites.*** We

236 evaluated the role of silenced genes during excystation of *Cryptosporidium* sporozoites

237 measuring the excystation rate by fluorescence (Fig 1A). Silencing did not produce a significant

238 reduction on excystation rate for any of the targets (Fig. 1B).

239

240 ***Gene silencing of selected genes blocks parasite entry.***

241 We evaluated gene silencing by flow cytometry using an invasion model (Fig 2A), for these

242 experiments we measured the proportion of CFSE-labeled parasites that failed to invade HCT-8

243 cells (Fig 2A). First, we defined sporozoites population by flow cytometry (Fig S1A). For the

244 invasion model, we transfected parasites and then evaluated the number of sporozoites in the

245 supernatant s. The results indicates that control group transfected only with PTR has ~65% of

246 stained cells (merozoites), in contrast silencing of Rom1 significantly increased the number of

247 gated cells, meaning that sporozoites did not invaded the host cells (Fig 2B). Silencing of NDK,

248 Ap2 and Actin also showed a partially effect on sporozoite invasion (Fig 2B). We did not

249 observed differences between untreated parasites and transfected parasites with PTR (data not

250 shown).

251

252 ***NDK inhibition reduces parasite proliferation.*** To evaluate the effects of gene silencing on

253 parasite division we used a proliferation model (Fig 3), parasites were labeled with CFSE and

254 collected at 16 hours post-infection prior to the time of egress (Fig 3). For controls, cell

255 proliferation led to decreased CFSE signal, such that 89% of cells had decreased signal by 16

256 hours (Fig 3A). By contrast, after silencing of NDK, Ap2 or Actin, only 28-35% of cells had

257 decreased CFSE signal (Figure 3B). Silencing of CP23 and Rom1 had intermediate values,  
258 suggesting partial inhibition of proliferation (54-55%). In additional studies we tested the effect of  
259 EA acid on sporozoites viability, we did not observe killing effect of EA on sporozoites (Fig S1B).

260

261 ***Silencing of Rom1 and AP2 reduced parasite egress.*** To test the effects of silencing on  
262 egress, we transfected intracellular parasites on infected HCT-8 cells. Transfected complexes  
263 did not affect the viability of HCT-8 cells (Fig S2), however we observed a reduction on  
264 expression in all tested targets (Fig S3). After confirmation of silencing, fresh media was added  
265 to collect merozoites released between 16-19 hrs (Fig S4). To evaluate the egress, we  
266 conducted qRT-PCR to quantify the relative number of merozoites in supernatants of treated  
267 samples and untreated samples (Fig 4B). There was a significant reduction in the number of  
268 merozoites observed in the supernatant of silenced samples (Fig 4B). Therefore, these results  
269 indicated that silencing of DKN and Actin reduced both parasite proliferation and egress. By  
270 contrast, silencing of Ap2 and Rom1 markedly reduced egress out of proportion to the effects on  
271 proliferation.

272

273 ***Ellagic acid treatment blocks parasite proliferation.*** Since NDK silencing showed the highest  
274 level of reduction in proliferation, we evaluated the anticryptosporidial activity of the NDK  
275 inhibitor Ellagic acid (EA) in the HCT-8 infection model. The results showed that EA inhibited  
276 parasite proliferation at micromolar concentrations (Fig 5), with an EC50 of within 15-30  $\mu$ M. In  
277 contrast, our results showed that EA is not cytotoxic at these concentrations (Supplementary  
278 figure S5). In order to evaluate the anticryptosporidial mechanism, we evaluated the expression  
279 of proliferation and apoptosis markers in the parasites. Our results showed a significant down  
280 regulation of separine and meta-caspases (Fig 5B-C), which suggest a parasitostatic and  
281 parasitocidal effect by blocking proliferation and inducing apoptosis.

## 282 Discussion

283 *Cryptosporidium* lacks the machinery involved with mammalian gene silencing<sup>6</sup>. In previous  
284 studies, we have demonstrated the feasibility to silence *Cryptosporidium* genes by transfecting  
285 oocysts with human Argonaute (with slicer activity) loaded with ssRNA<sup>5</sup>. These initial  
286 experiments confirmed reduction at protein levels and pointed out the usefulness of the method  
287 to evaluate parasite invasion. Since the silencing is maintained up to 24 hrs., then we  
288 hypothesized that this method could be used to evaluate other key biological processes during  
289 the asexual cycle of parasites maintained in HCT-8 cells (e.g. excystation, proliferation and  
290 egress). Thus the overall goal of this study was to use the silencing method to identify targets  
291 that are critical for different steps in the parasite life-cycle. Our first step in this work was to  
292 identify druggable candidates for gene silencing. We used transcriptional data to prioritize genes  
293 highly expressed during invasion, proliferation and egress stages. Also we prioritized genes with  
294 low homology with host molecules, but highly conserved between *Cryptosporidium* species.  
295 After initial analysis, we identified 100 potential candidates (Fig S1). We developed antisense  
296 ssRNA sequences to silence selected genes. In these experiments silencing rates were among  
297 30-94% (Data not shown). Since partial silencing (30-75%) may not be optimal for phenotypic  
298 studies, then in this work we only used antisense ssRNA that induces >75%. Selected genes for  
299 silencing included: 1) Actin, an structural essential for *Cryptosporidium* motility<sup>7</sup>, 2) NDK an  
300 essential gene for synthesis of nucleotides<sup>8</sup> 3) Rom1, a protease involved on invasion and  
301 egress in other apicomplexan<sup>9</sup> and 4) Ap2, which is a transcription factor involved in  
302 proliferation<sup>7</sup>. First, we evaluated the effect of silencing during parasite excystation. The  
303 excystation assays showed that none of the silenced genes had effect on this process  
304 suggesting that these proteins are not essential for excystation. This result was expected since  
305 transcriptomic data has showed that the majority of genes (~85%) in *Cryptosporidium* are  
306 expressed after excystation process<sup>10</sup>. The invasion assay indicated that silencing of Rom1

307 blocks parasite entry. This proteolytic enzyme has previously been implicated in parasite  
308 invasion<sup>11</sup>. Orthologue rhomboid protease in *Toxoplasma* cleaves cell surface adhesins, and  
309 have been demonstrated that this protein is essential for invasion<sup>11</sup>. In *Plasmodium* PfROM1  
310 and PfROM4 helped in merozoite invasion by catalyzing the intramembrane cleavage of the  
311 merozoite adhesin AMA1<sup>11</sup>. Actin silencing also showed inhibited Invasion. Apicomplexan  
312 parasites actively invade host cells using a mechanism predicted to be powered by a parasite  
313 actin-dependent myosin motor. Actin in invasion was first suggested by studies demonstrating  
314 the ability of the actin polymerization inhibitor cytochalasin D (CytD) to block invasion<sup>12</sup>. The  
315 proliferation assay showed that NDK, Ap2, Actin but not Rom1 reduced parasite proliferation.  
316 Nucleoside diphosphate kinases (NDK) are enzymes required for the synthesis of nucleoside  
317 triphosphates (NTP) other than ATP. They provide NTPs for nucleic acid synthesis, CTP for lipid  
318 synthesis, UTP for polysaccharide synthesis and GTP for protein elongation, signal transduction  
319 and microtubule polymerization. Not surprisingly, NDK is essential for intracellular parasite  
320 proliferation. Actin proteins are related with cytoskeleton motility during cell division.  
321 *Cryptosporidium* transcriptomic analysis demonstrated that actin is highly expressed between  
322 12-48 hrs after the infection, during this time the parasite is actively dividing passing from a  
323 single cell (trophozoite) to 8 cells (meronts II) in 24 hrs. We showed that silencing of AP2  
324 transcription factor also affected proliferation (Fig 3B). AP2 proteins are transcription factors  
325 which harbor a plant-like DNA-binding domain. Five AP2 proteins have been identified as key  
326 stage-specific regulators in *Plasmodium*, thus AP2 proteins have been implicated in *P.*  
327 *falciparum* var gene regulation by binding the SPE2 DNA motif and acting as a DNA-tethering  
328 protein involved in formation and maintenance of heterochromatin<sup>13</sup>. The role of AP2 proteins in  
329 gene regulation has also been investigated to a lesser degree in *T. gondii*, where several AP2  
330 proteins have been implicated in regulating progression through the cell cycle<sup>14</sup> as well as  
331 crucial virulence factors<sup>15</sup>. Other studies have implicated AP2s in regulating a developmental

332 transition<sup>16</sup>. Radke et al.<sup>17</sup> recently characterized a *T. gondii* AP2 and showed that this  
333 molecule acts as a repressor of bradyzoite development. Our results showed that egress assay  
334 was partially affected by parasite proliferation (Fig 4B). Silencing of NDK, AP2 and Actin  
335 blocked proliferation leading to a reduction in the number of merozoites (Fig 3B). In contrast,  
336 silencing with Rom 1 had an even greater effect on egress. Since that protein only had moderate  
337 effect in proliferation (Fig 3B), it is likely Rom1 is implicated in parasite egress through a  
338 proteolytic mechanism. In *Plasmodium*, release of merozoites from schizonts resulted in the  
339 movement of *Plasmodium* ROM1 from the lateral asymmetric localization to the merozoite  
340 apical pole and the posterior pole<sup>18</sup>.

341

342 Overall our in vitro studies confirmed that silenced genes blocks proliferation and egress in  
343 *Cryptosporidium* parasites, therefore we hypothesized that chemical inhibitors against these  
344 enzymes should arrest *Cryptosporidium* proliferation on infected cells. Since silencing of NDK  
345 showed effect during invasion, proliferation and egress then was selected for further studies.  
346 The inhibition of NDK activity by EA have been demonstrated<sup>19,20</sup>. Thus here we tested EA on  
347 the *Cryptosporidium* infection model, we observed anticryptosporidial activity of this compound  
348 at micromolar concentrations (Fig 5A). The EA is a natural compound found in strawberries and  
349 other fruits, thus this compound have been used as dietary complement to treat several  
350 diseases<sup>21,22</sup>, interestingly recently this compound showed its antimicrobial activity in the  
351 gastrointestinal pathogen *Helicobacter pylori*<sup>23</sup>. In order to investigate the mechanism of  
352 anticryptosporidial activity we evaluated expression proliferation (separine) and apoptosis  
353 markers (metacaspase) in the parasite. We observed a down regulation in separine expression  
354 (also known as separase) which is implicated chromatin regulation during meiosis and mitosis  
355 processes<sup>24</sup>, this finding suggest that EA may be blocking proliferation through NDK inhibition  
356 as observed in silencing experiments, however also we observed an up regulation of

357 metacaspase which suggest that other mechanisms may be involved in parasite killing. EA has  
358 showed multiple benefits to human health trough enhancement of immune system or epithelial  
359 barrier <sup>25-27</sup>, thus we speculate that EA has a dual effect on *Cryptosporidium* by reducing the  
360 infection trough the activation of host pathways (e.g. defensin secretion) and affecting essential  
361 enzymes on parasites. Interesting the micromolar concentrations tested here are under the  
362 biological concentration of EA acid commonly used in humans <sup>28</sup>, therefore future studies will be  
363 focused to characterize the effect of EA and metabolites on intestinal cells of infected mice. If  
364 these studies confirm the anticryptosporidial activity and activation of host response then we  
365 anticipate that this compound could be implemented in a very near future in the treatment in  
366 humans infected with *Cryptosporidium*.

367

#### 368 **ACKNOWLEDGMENTS**

369 AC was supported by the Bill & Melinda Gates Foundation grant: OPP1161026 and by grant:  
370 5R21AI12627502 from the National Institute of Allergy and Infectious Diseases, National  
371 Institutes of Health.

372

373

374

375

376

377

378

379

380

381



## 382 REFERENCES

- 383 1 Khalil, I. A. *et al.* Morbidity, mortality, and long-term consequences associated with diarrhoea  
384 from Cryptosporidium infection in children younger than 5 years: a meta-analysis study. *Lancet*  
385 *Glob Health* **6**, e758-e768, doi:10.1016/S2214-109X(18)30283-3 (2018).
- 386 2 Sparks, H., Nair, G., Castellanos-Gonzalez, A. & White, A. C., Jr. Treatment of Cryptosporidium:  
387 What We Know, Gaps, and the Way Forward. *Curr Trop Med Rep* **2**, 181-187,  
388 doi:10.1007/s40475-015-0056-9 (2015).
- 389 3 Huston, C. D. *et al.* A Proposed Target Product Profile and Developmental Cascade for New  
390 Cryptosporidiosis Treatments. *PLoS Negl Trop Dis* **9**, e0003987,  
391 doi:10.1371/journal.pntd.0003987 (2015).
- 392 4 Checkley, W. *et al.* A review of the global burden, novel diagnostics, therapeutics, and vaccine  
393 targets for cryptosporidium. *Lancet Infect Dis* **15**, 85-94, doi:10.1016/S1473-3099(14)70772-8  
394 (2015).
- 395 5 Castellanos-Gonzalez, A., Perry, N., Nava, S. & White, A. C., Jr. Preassembled Single-Stranded  
396 RNA-Argonaute Complexes: A Novel Method to Silence Genes in Cryptosporidium. *The Journal*  
397 *of infectious diseases* **213**, 1307-1314, doi:10.1093/infdis/jiv588 (2016).
- 398 6 Abrahamsen, M. S. *et al.* Complete genome sequence of the apicomplexan, Cryptosporidium  
399 parvum. *Science* **304**, 441-445, doi:10.1126/science.1094786 (2004).
- 400 7 Wetzel, D. M., Schmidt, J., Kuhlenschmidt, M. S., Dubey, J. P. & Sibley, L. D. Gliding motility leads  
401 to active cellular invasion by Cryptosporidium parvum sporozoites. *Infection and immunity* **73**,  
402 5379-5387, doi:10.1128/IAI.73.9.5379-5387.2005 (2005).
- 403 8 Weiss, B. The deoxycytidine pathway for thymidylate synthesis in Escherichia coli. *J Bacteriol*  
404 **189**, 7922-7926, doi:10.1128/JB.00461-07 (2007).
- 405 9 Sibley, L. D. How apicomplexan parasites move in and out of cells. *Curr Opin Biotechnol* **21**, 592-  
406 598, doi:10.1016/j.copbio.2010.05.009 (2010).
- 407 10 Mauzy, M. J., Enomoto, S., Lancto, C. A., Abrahamsen, M. S. & Rutherford, M. S. The  
408 Cryptosporidium parvum transcriptome during in vitro development. *PloS one* **7**, e31715,  
409 doi:10.1371/journal.pone.0031715 (2012).
- 410 11 Zhao, H. F. *et al.* High-throughput screening of effective siRNAs from RNAi libraries delivered via  
411 bacterial invasion. *Nat Methods* **2**, 967-973, doi:10.1038/nmeth812 (2005).
- 412 12 Dobrowolski, J. M. & Sibley, L. D. Toxoplasma invasion of mammalian cells is powered by the  
413 actin cytoskeleton of the parasite. *Cell* **84**, 933-939 (1996).
- 414 13 Flueck, C. *et al.* A major role for the Plasmodium falciparum ApiAP2 protein PfSIP2 in  
415 chromosome end biology. *PLoS pathogens* **6**, e1000784, doi:10.1371/journal.ppat.1000784  
416 (2010).
- 417 14 Radke, J. B. *et al.* ApiAP2 transcription factor restricts development of the Toxoplasma tissue  
418 cyst. *Proceedings of the National Academy of Sciences of the United States of America* **110**,  
419 6871-6876, doi:10.1073/pnas.1300059110 (2013).
- 420 15 Lesage, K. M. *et al.* Cooperative binding of ApiAP2 transcription factors is crucial for the  
421 expression of virulence genes in Toxoplasma gondii. *Nucleic acids research* **46**, 6057-6068,  
422 doi:10.1093/nar/gky373 (2018).
- 423 16 Huang, S. *et al.* Toxoplasma gondii AP2IX-4 Regulates Gene Expression during Bradyzoite  
424 Development. *mSphere* **2**, doi:10.1128/mSphere.00054-17 (2017).
- 425 17 Radke, J. B. *et al.* Transcriptional repression by ApiAP2 factors is central to chronic  
426 toxoplasmosis. *PLoS pathogens* **14**, e1007035, doi:10.1371/journal.ppat.1007035 (2018).



- 427 18 Singh, S., Plassmeyer, M., Gaur, D. & Miller, L. H. Mononeme: a new secretory organelle in  
428 Plasmodium falciparum merozoites identified by localization of rhomboid-1 protease.  
429 *Proceedings of the National Academy of Sciences of the United States of America* **104**, 20043-  
430 20048, doi:10.1073/pnas.0709999104 (2007).
- 431 19 Buxton, I. L. Inhibition of Nm23H2 gene product (NDPK-B) by angiostatin, polyphenols and  
432 nucleoside analogs. *Proc West Pharmacol Soc* **51**, 30-34 (2008).
- 433 20 Malmquist, N. A., Anzinger, J. J., Hirzel, D. & Buxton, I. L. Ellagic acid inhibits nucleoside  
434 diphosphate kinase-B activity. *Proc West Pharmacol Soc* **44**, 57-59 (2001).
- 435 21 Soh, P. N. *et al.* In vitro and in vivo properties of ellagic acid in malaria treatment. *Antimicrobial*  
436 *agents and chemotherapy* **53**, 1100-1106, doi:10.1128/AAC.01175-08 (2009).
- 437 22 Ceci, C. *et al.* Experimental Evidence of the Antitumor, Antimetastatic and Antiangiogenic  
438 Activity of Ellagic Acid. *Nutrients* **10**, doi:10.3390/nu10111756 (2018).
- 439 23 De, R. *et al.* Antimicrobial activity of ellagic acid against Helicobacter pylori isolates from India  
440 and during infections in mice. *J Antimicrob Chemother* **73**, 1595-1603, doi:10.1093/jac/dky079  
441 (2018).
- 442 24 Gurvits, N. *et al.* Separase is a marker for prognosis and mitotic activity in breast cancer. *Br J*  
443 *Cancer* **117**, 1383-1391, doi:10.1038/bjc.2017.301 (2017).
- 444 25 Promsong, A., Chung, W. O., Sattakarn, S. & Nittayananta, W. Ellagic acid modulates the  
445 expression of oral innate immune mediators: potential role in mucosal protection. *J Oral Pathol*  
446 *Med* **44**, 214-221, doi:10.1111/jop.12223 (2015).
- 447 26 Marin, M., Maria Giner, R., Rios, J. L. & Recio, M. C. Intestinal anti-inflammatory activity of  
448 ellagic acid in the acute and chronic dextrane sulfate sodium models of mice colitis. *J*  
449 *Ethnopharmacol* **150**, 925-934, doi:10.1016/j.jep.2013.09.030 (2013).
- 450 27 Goyal, Y., Koul, A. & Ranawat, P. Ellagic acid ameliorates cisplatin induced hepatotoxicity in  
451 colon carcinogenesis. *Environ Toxicol*, doi:10.1002/tox.22747 (2019).
- 452 28 Liu, Y. *et al.* Chronic administration of ellagic acid improved the cognition in middle-aged  
453 overweight men. *Appl Physiol Nutr Metab* **43**, 266-273, doi:10.1139/apnm-2017-0583 (2018).

454

455

## 456 **Supporting Information Legends**

457

### 458 **Table and Figures Legends (supplemental data)**

459

460 Table S1. Accession numbers of *Cryptosporidium* sequences used for antisense ssRNA  
461 design.

462

463 Table S2. *Cryptosporidium* antisense ssRNA sequences used in this study.

464 Table S3. Target genes and primer sequences used for RT-PCR analysis.

465

466 Figure S1. Sporozoites of *Cryptosporidium* by Flow cytometry (A). *Cryptosporidium* oocysts  
467 were stained with CFSE and then excystation was induced. Parasites were filtered and then  
468 sample was analyzed by flow cytometry. Effect of EA on oocyst and excystation by flow  
469 cytometry (B), we treated stained oocyst with EA and then excystation was induced.

470

471 Figure S2. Expression of human 18s gene in HCT-8-cells after transfection. HCT-8 cells were  
472 infected with *Cryptosporidium* sporozoites and then transfected with ssRNA. For these  
473 experiments, after 2 hours of infection the supernatant was removed and new culture media  
474 was added. Next, silencer complexes were added to the infected cells and incubated overnight.  
475 To evaluate cytotoxic effects of ssRNA or HCT-8 we quantified 18s rRNA, if cells die this should  
476 be reflected as reduction of this marker. Figure shows no differences between wild type (WT),  
477 protein transfection reagent alone (PTR), and tested ssRNAs ssAct, ssAp2, ssNDK, ssRom1  
478 (encapsulated in PTR).

479

480 Figure S3. Gene silencing after infection. In this experiment we tested the silencing on  
481 intracellular forms (merozoites) within HCT-8 cells. For these experiments we infected and  
482 treated cells as described above and we evaluated the silencing by qRT-PCR in total RNA from  
483 infected cells transfected with silencer complexes. The figure shows PCR CT values from  
484 duplicate experiments of transfected cells with silencer complexes (gray bar) and cells  
485 transfected only with PTR. All cells treated with ssRNA showed a delay in the amplification cycle  
486 when compared with controls. All samples were normalized against GAPDH. Standard deviation  
487 of PCR triplicates is shown in each bar.

488

489 Figure S4. *Cryptosporidium* merozoites collected at 16 hrs of infection. *Cryptosporidium*  
490 merozoites by flow cytometry. HCT-8 cells were infected with labeled sporozoites. After  
491 infection, silencing was induced, then at 16 hrs of infection (before egress) supernatant was  
492 removed and fresh media was added. Supernatant was collected again a 19 hrs and analyzed  
493 by flow cytometry, then % of merozoites were evaluated in samples treated only with PTR (left),  
494 merozoites are not observed in supernatants of non-infected samples (right).

495

496 Figure S5. Ellagic acid and viability on HCT-8 cells. Effect of EA on non-infected (NI) HCT-8  
497 cells. HCT-8 cells were treated with EA (or not) and then viability was evaluated measuring the  
498 activation of the vital dye CFSE. The figure shows the % of cells positives for CFSE.

499

#### 500 **Table and Figures Legends (main manuscript)**

501

502 Table 1. Gene silencing in *Cryptosporidium*. Selected targets (yellow column) were silenced  
503 with antisense ssRNA (gray column) and hAgo2 complexes. Silencing was evaluated by RT-  
504 PCR and Ct values were determined in treated with hAgo2/target ssRNA (red column) and  
505 hAgo2/unrelated ssRNA (green column). The silencing was calculated as fold change relative to  
506 control sample and expressed as percentage, SD=standard deviation (blue column).

507

508 Figure 1. *Cryptosporidium* excystation assay. *Excystation model (A)*. Parasites were stained  
509 with a vital dye (highlighted in green) and transfected with hAgo2/target ssRNA (highlighted in  
510 yellow), then excystation was induced and sporozoites were filtered (highlighted in blue).  
511 Sporozoites were quantified by fluorometry (highlighted in purple). *Effect of silencing on*  
512 *excystation (B)*. *Cryptosporidium* oocysts were transfected with silencer complexes (+) or not (-),  
513 we induced excystation and compared fluorescence in treated (grey bars) and untreated

514 oocysts (black bar). Experiments were conducted by triplicate. Non statistical difference was  
515 observed between control and treated samples.

516

517 Figure 2. *Cryptosporidium* invasion assay. *Invasion model (A)*. Transfected parasites were used  
518 to infect HCT-8 cells (infected cells shown in red square), after 1 hr of infection supernatant  
519 (square green) was collected and % of sporozoites was evaluated by flow cytometry. *Effect of*  
520 *silencing on parasite entrance by Flow cytometry (B)*. Silencing was induced or not (PTR) and  
521 then sporozoites were used to infect cells, parasites that did not invade cells were evaluated in  
522 supernatants (SN). wt= unstained wild typte, PTR= parasites treated only with protein  
523 transfection reagent.

524

525 Figure 3. *Cryptosporidium* proliferation assay. Stained parasites (sowed in green) were  
526 transfected and then used to infect HCT-8 cells, division of WT parasites within infected cells  
527 was analyzed by flow cytometry 0-16 hrs tracking reduction of fluorescent signal (A). Division of  
528 transfected parasites was analyzed at 16 hrs and compared with untreated parasites (PTR) or  
529 parasites treated with unrelated target Cp23 (B).

530

531 Figure 4. *Cryptosporidium* egress assay. Egress model (A). Parasites were stained (green) and  
532 used to infect HCT-8 cells. We induce silencing on parasites within infected cells. Then,  
533 supernatant from 16-19 hrs was collected and evaluated by flow cytometry (B). Total numbers  
534 of parasites (in 200  $\mu$ l) were determined by qRT-PCR in treated samples (grey bars) and control  
535 sample treated only with PTR (red bar) and non-infected cells (NI). The experiments were  
536 conducted in triplicates, SD and p values (\*=  $p \leq 0.05$ ) are shown.

537

538 Figure 5. Anticryptosporidial activity of Ellagic acid (EA). Reduction of parasites on infected cells  
539 by EA. We infected human intestinal cells (HCT-8) with *Cryptosporidium*, after the infection cells  
540 were treated with different amounts of EA and then we evaluated the parasite burden by qRT-  
541 PCR (A). Activation of apoptosis by EA. We evaluated expression of apoptosis marker  
542 metacaspase in treated (with bar) and untreated (grey bar) cells (B). Inhibition of proliferation by  
543 EA. Expression of proliferation marker separine was evaluated by qRT-PCR on infected cells  
544 treated (with bar) and untreated (grey bar) with EA (C). RT-PCR experiments were conducted  
545 by triplicate, and standard deviation is indicated in each bar.

Table 1

| RT-PCR amplified Target | Antisense ssRNA 21nt | Ct value Ago/ssRNA | Ct value Ago/unrelated RNA | % silencing ± SD |
|-------------------------|----------------------|--------------------|----------------------------|------------------|
| Actin                   | ssAct                | 31.4 ± 0.4         | 28.3 ± 0.8                 | 78 ± 3           |
| Ap2                     | ssAp2                | 25.3 ± 0.3         | 21.3 ± 0.2                 | 94 ± 0           |
| NDK                     | ssNDK                | 27.3 ± 0.7         | 23.6 ± 0.6                 | 93 ± 0           |
| Rom1                    | ssRom1               | 46.5 ± 4.1         | 43.0 ± 2.7                 | 96 ± 1           |

bioRxiv preprint doi: <https://doi.org/10.1101/626317>; this version posted May 2, 2019. The copyright holder for this preprint (which was not certified by peer review) is the author/funder, who has granted bioRxiv a license to display the preprint in perpetuity. It is made available under aCC-BY 4.0 International license.

Figure 1

A

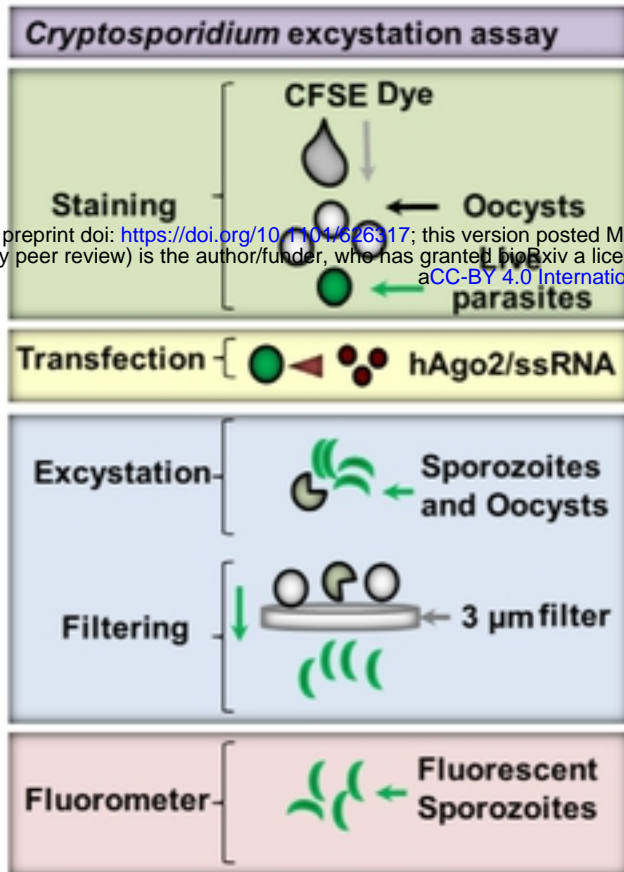

B

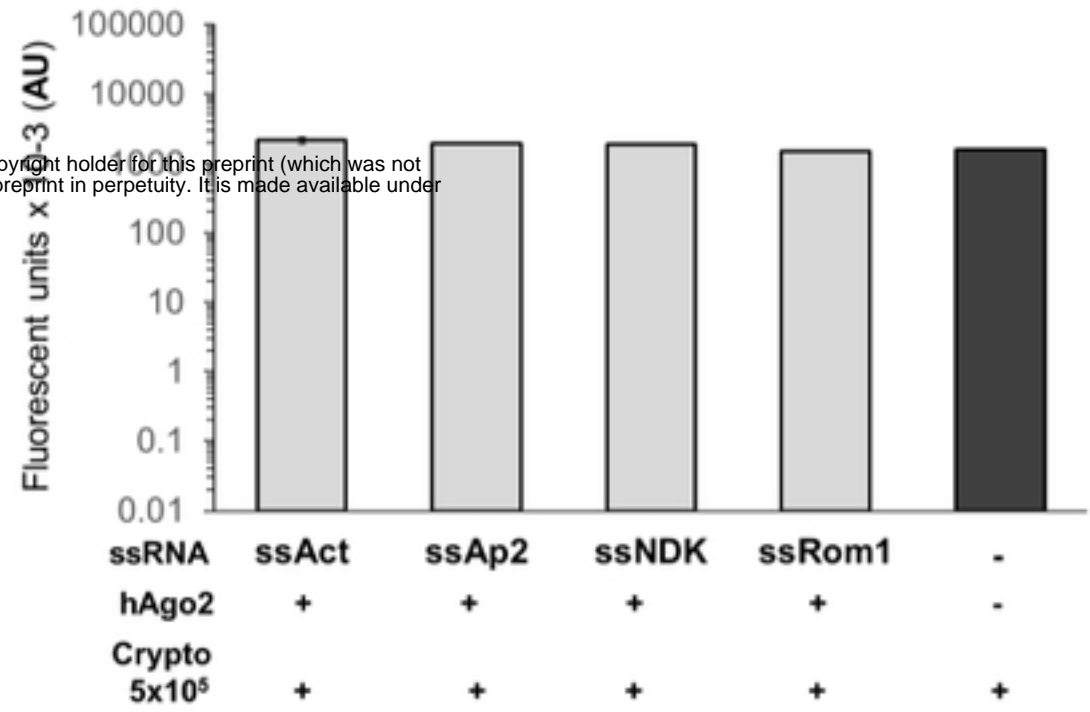

bioRxiv preprint doi: <https://doi.org/10.1101/626317>; this version posted May 2, 2019. The copyright holder for this preprint (which was not certified by peer review) is the author/funder, who has granted bioRxiv a license to display the preprint in perpetuity. It is made available under aCC-BY 4.0 International license.

Figure 2

A

### Gene silencing

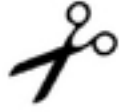

mRNA

target

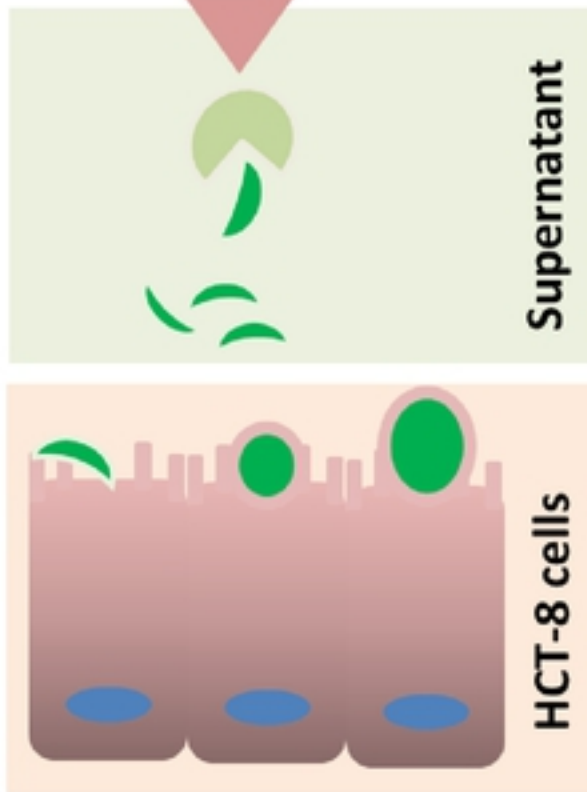

B

SN wt not stained 1h

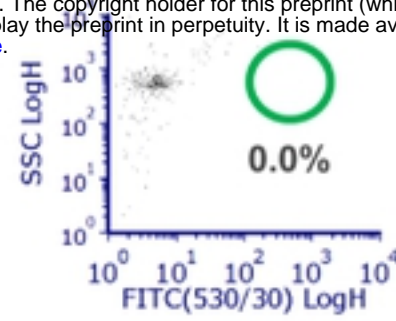

SN PTR 1h

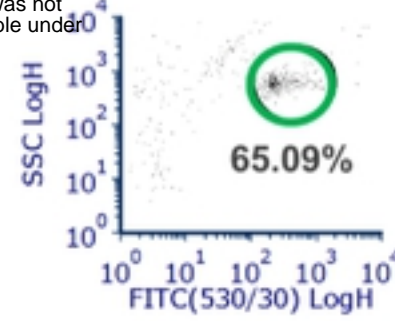

SN NDK 1 h

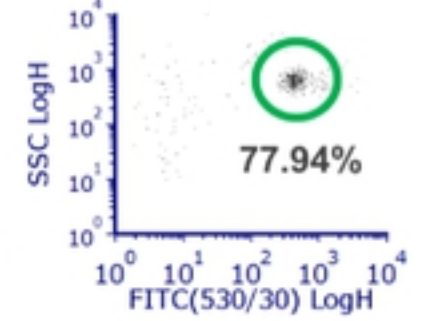

SN Actin 1h

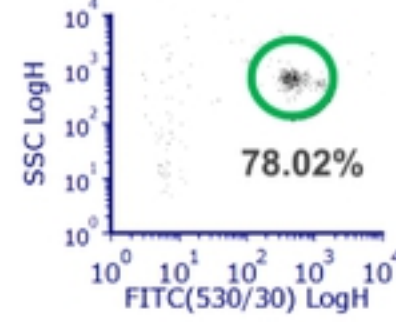

SN Ap2 1h

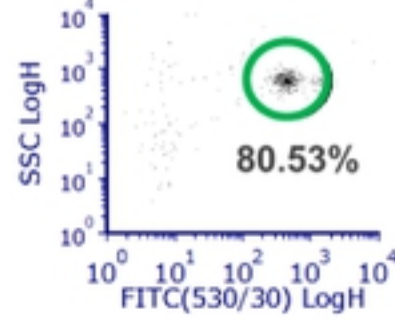

SN Rom1 1h

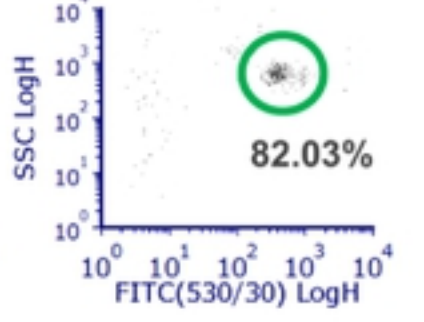

bioRxiv preprint doi: <https://doi.org/10.1101/626317>; this version posted May 2, 2019. The copyright holder for this preprint (which was not certified by peer review) is the author/funder, who has granted bioRxiv a license to display the preprint in perpetuity. It is made available under aCC-BY 4.0 International license.



Figure 3

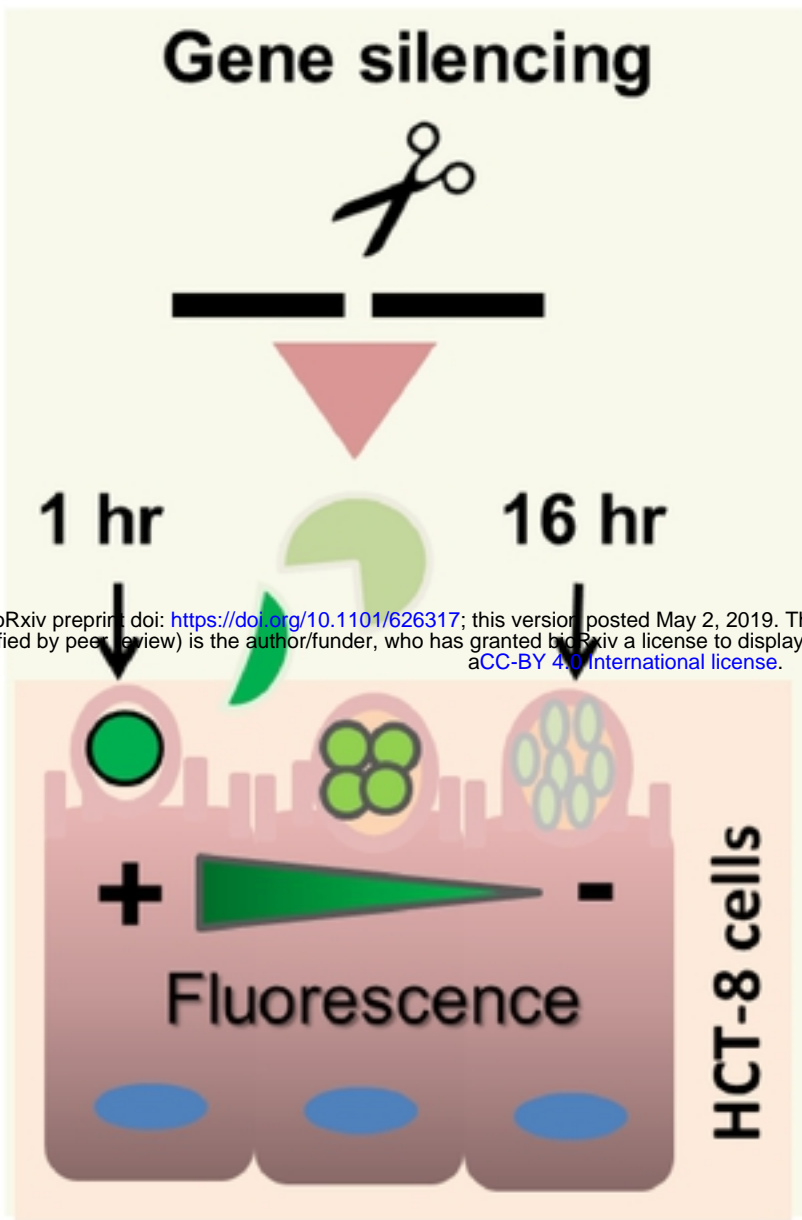

bioRxiv preprint doi: <https://doi.org/10.1101/626317>; this version posted May 2, 2019. The copyright holder for this preprint (which was not certified by peer review) is the author/funder, who has granted bioRxiv a license to display the preprint in perpetuity. It is made available under aCC-BY 4.0 International license.

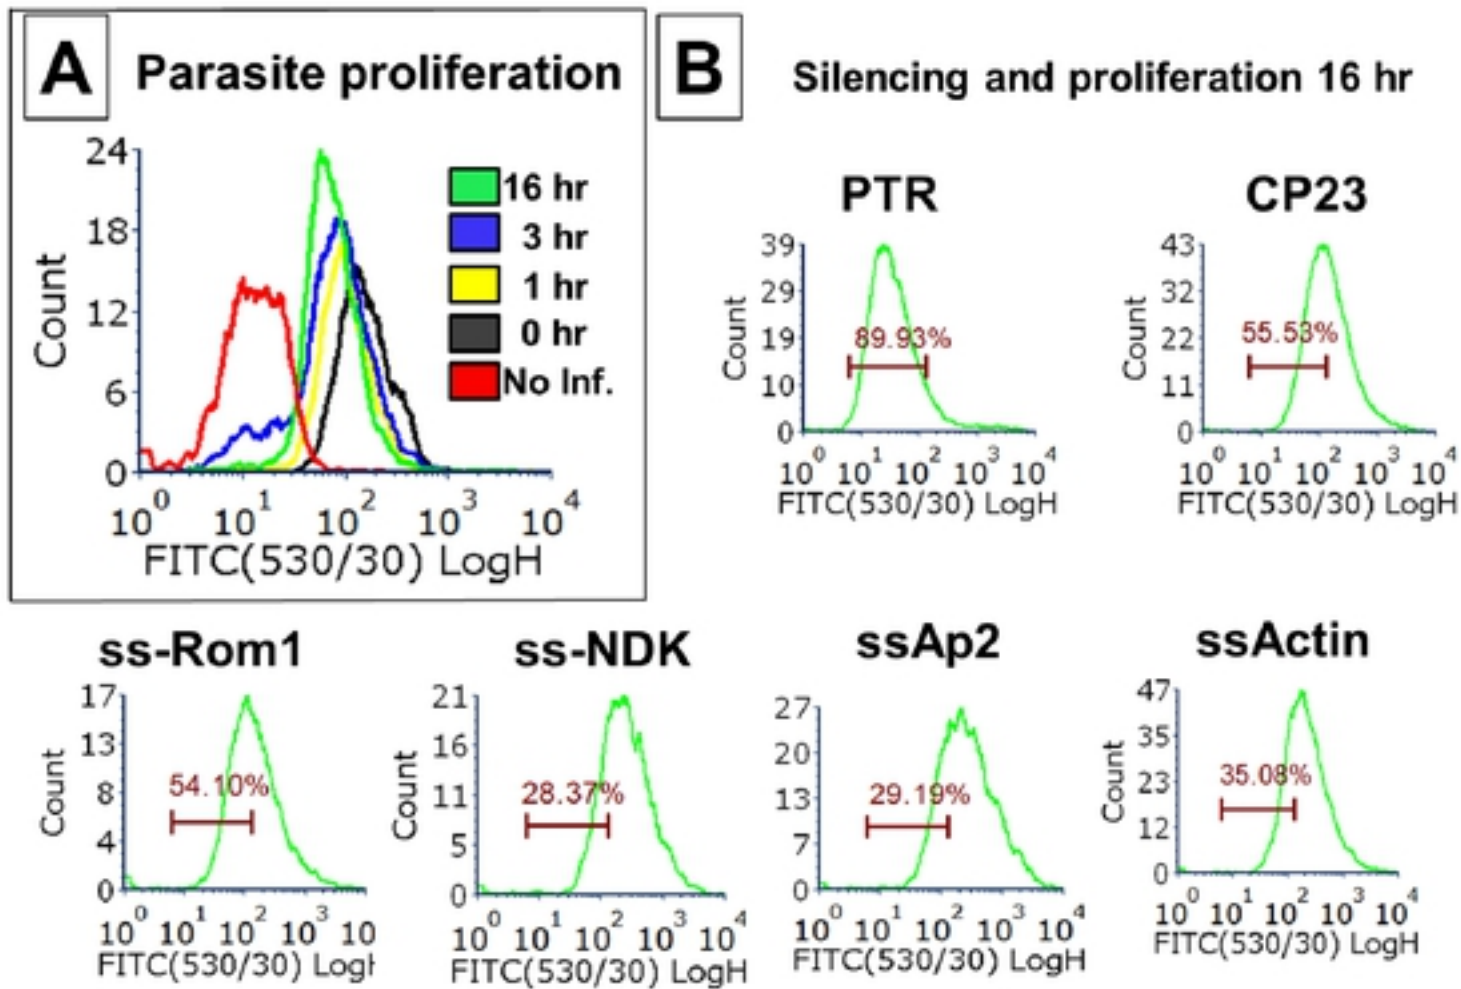

Figure 4

A

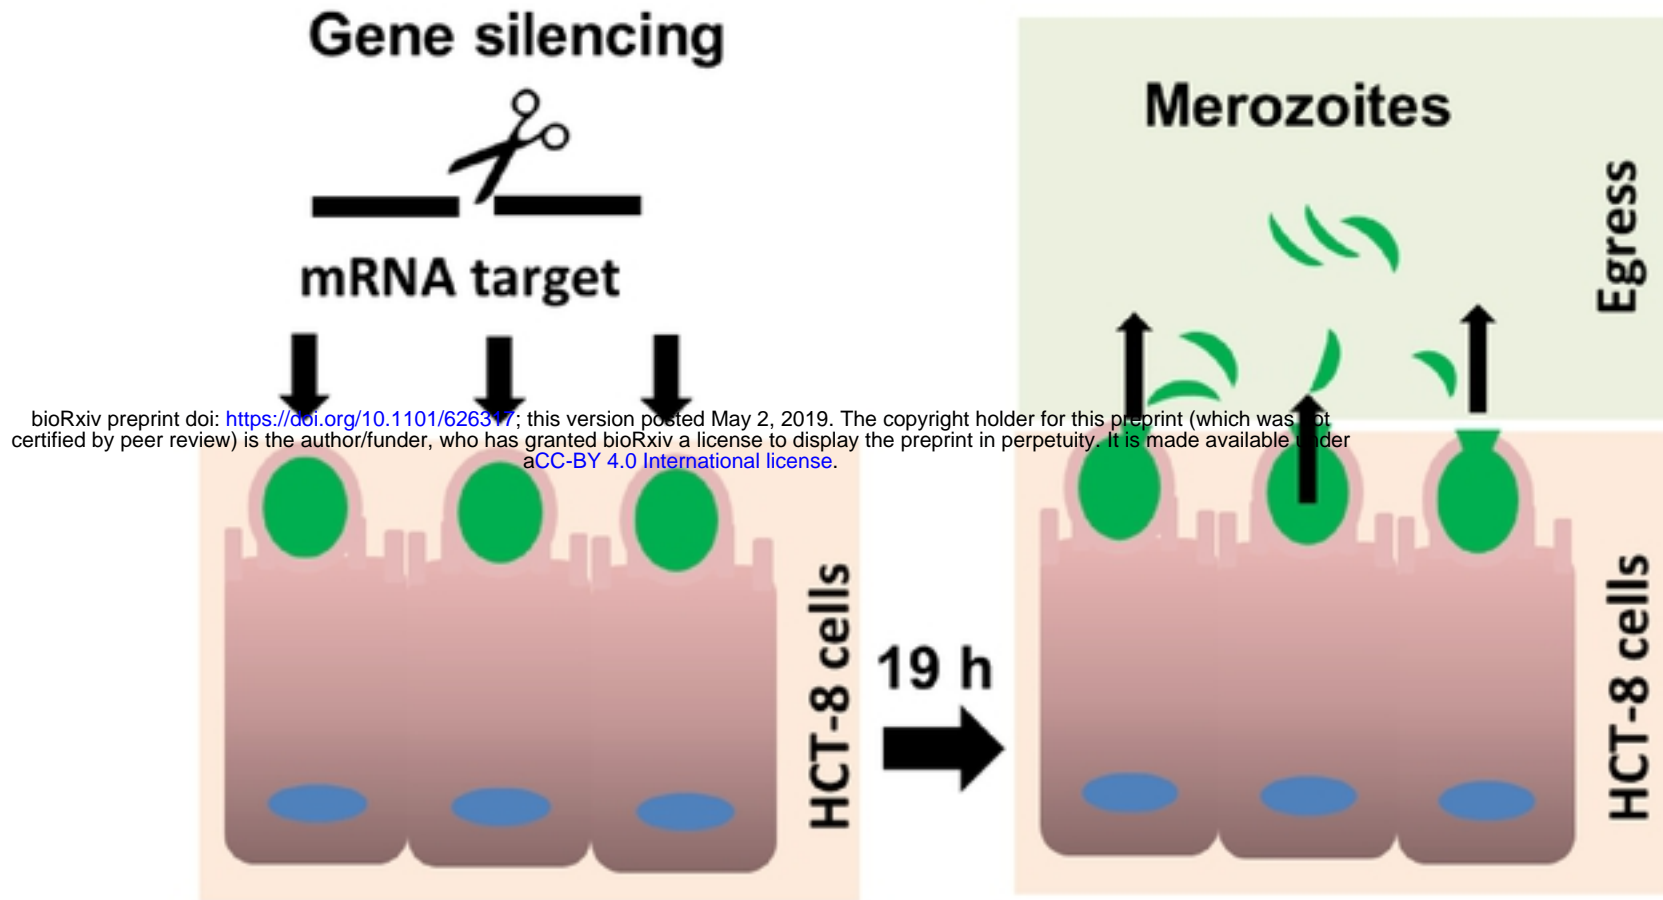

B

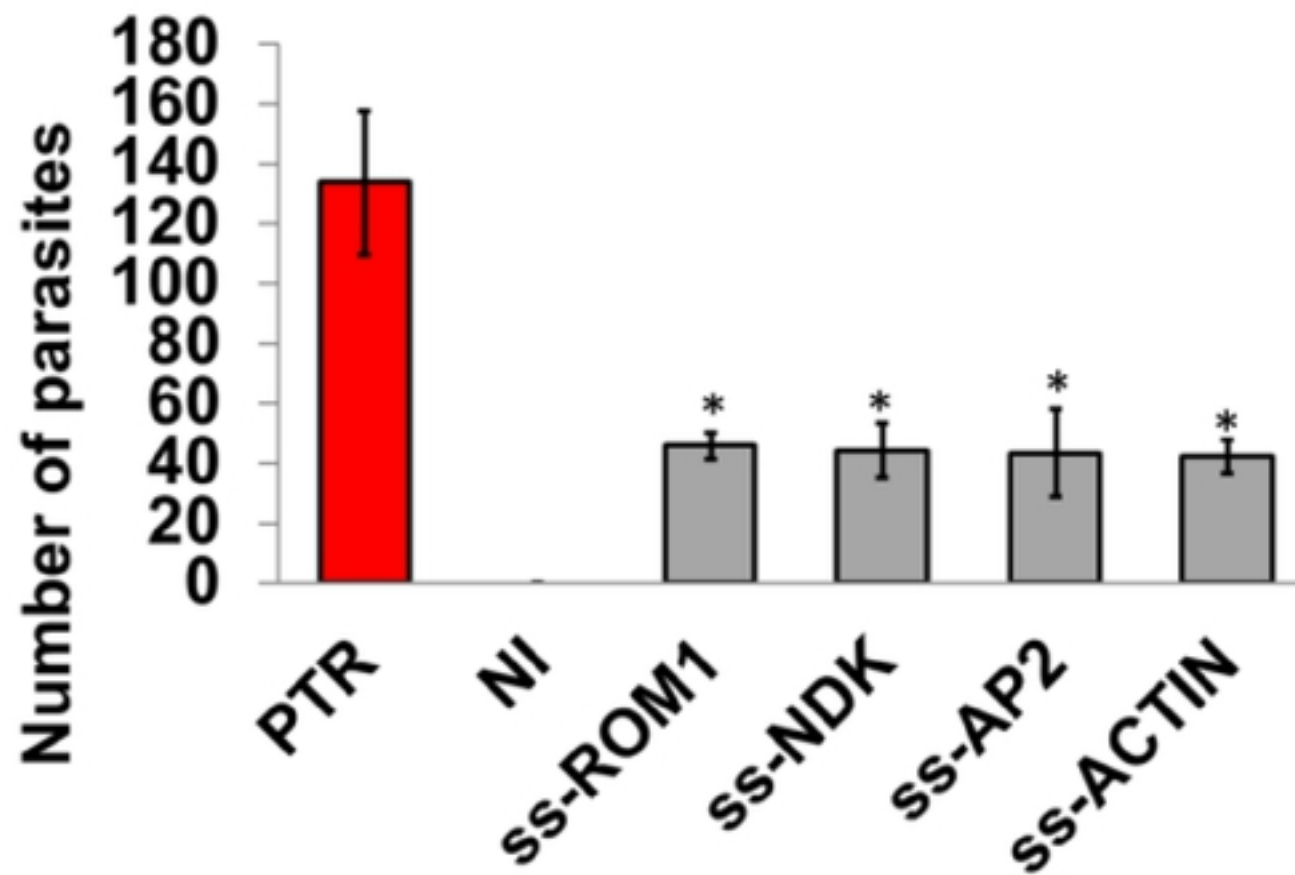

Figure 5

A

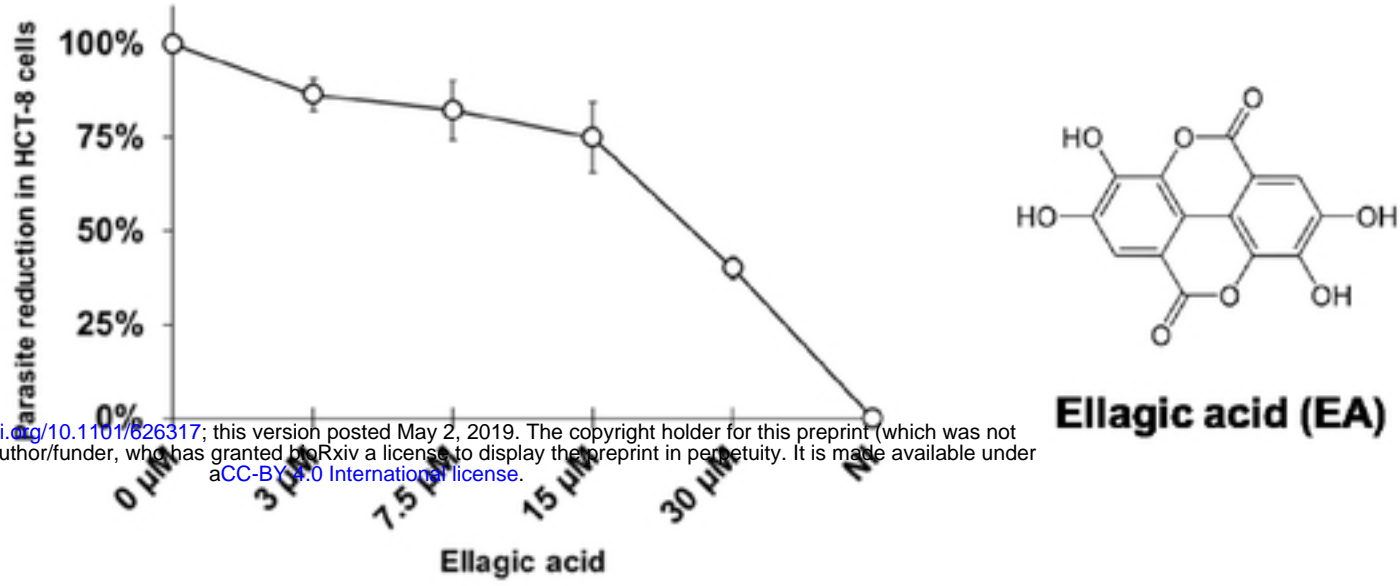

bioRxiv preprint doi: <https://doi.org/10.1101/626317>; this version posted May 2, 2019. The copyright holder for this preprint (which was not certified by peer review) is the author/funder, who has granted bioRxiv a license to display the preprint in perpetuity. It is made available under aCC-BY 4.0 International license.

B

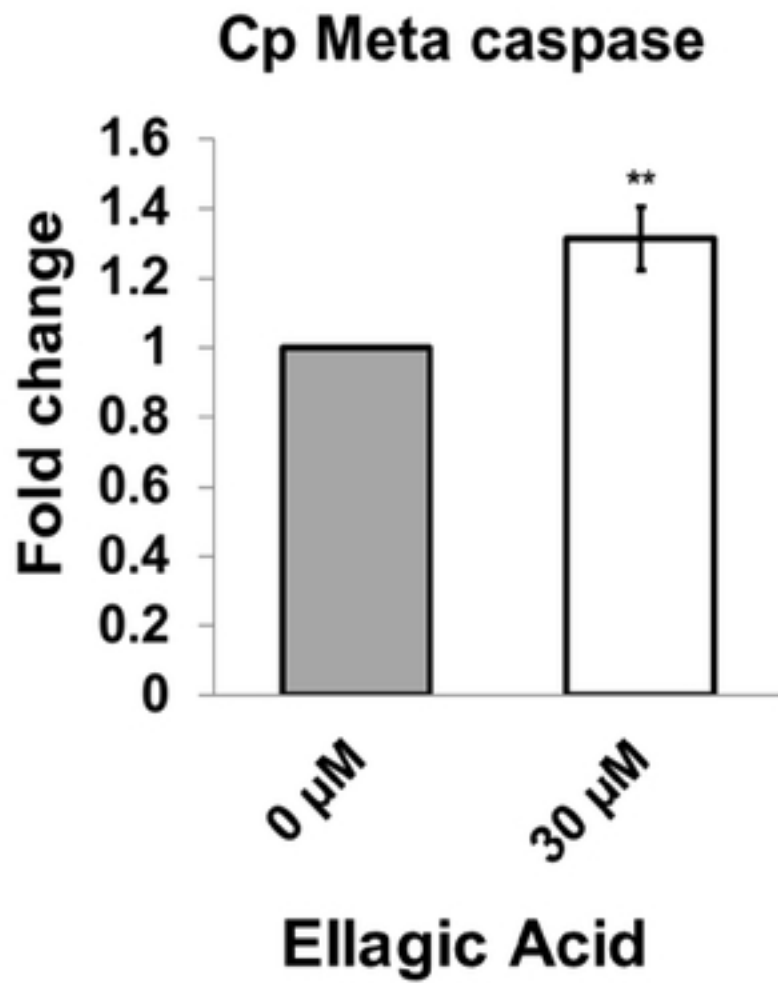

C

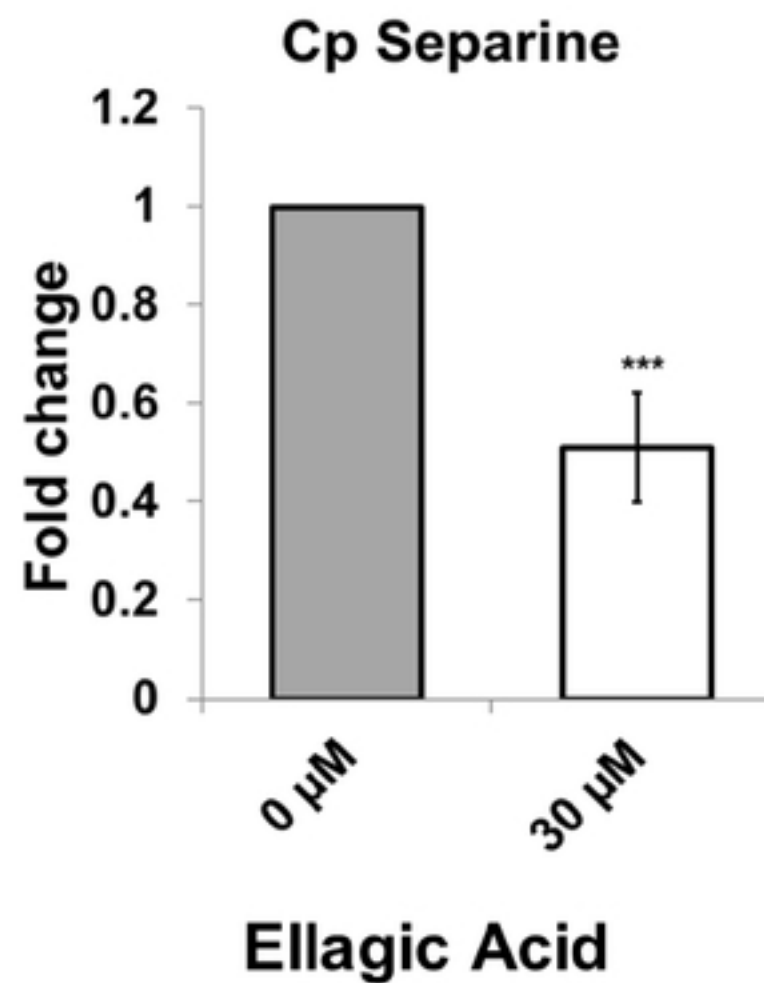

Source: https://www.biorxiv.org/content/10.1101/626317v1.full.pdf
